# Supplementary material
Source: ML conference proceedings conference paper supplement (https://openreview.net/forum?id=rhV6QTMqq1)
Supplement: supplementary_material [file token_W_wordcloud_high.pdf › Logic_Math/figs/token_W_wordcloud_high.pdf]

Im } ← ← cept + = ote)\* + p } gs □ uit erc \*  
} floor ipse } ← inear } e cepts top \*  
bp ,c ram (| } af even ots pm rom  
suit ola ps } { && \\\ \*pi { \$ ep v / a  
ca } \_ { Row + C + f ,D (lower o ,q ies  
wise = y ht [n ymax(funcgx  
\* X able name ector min , { } i { j  
umber < = { CF func xmin , C option { ← )/omial > =  
) } \* g return command , C graf (R{ I end
