# Supplementary material
Source: ML conference proceedings conference paper supplement (https://openreview.net/forum?id=rhV6QTMqq1)

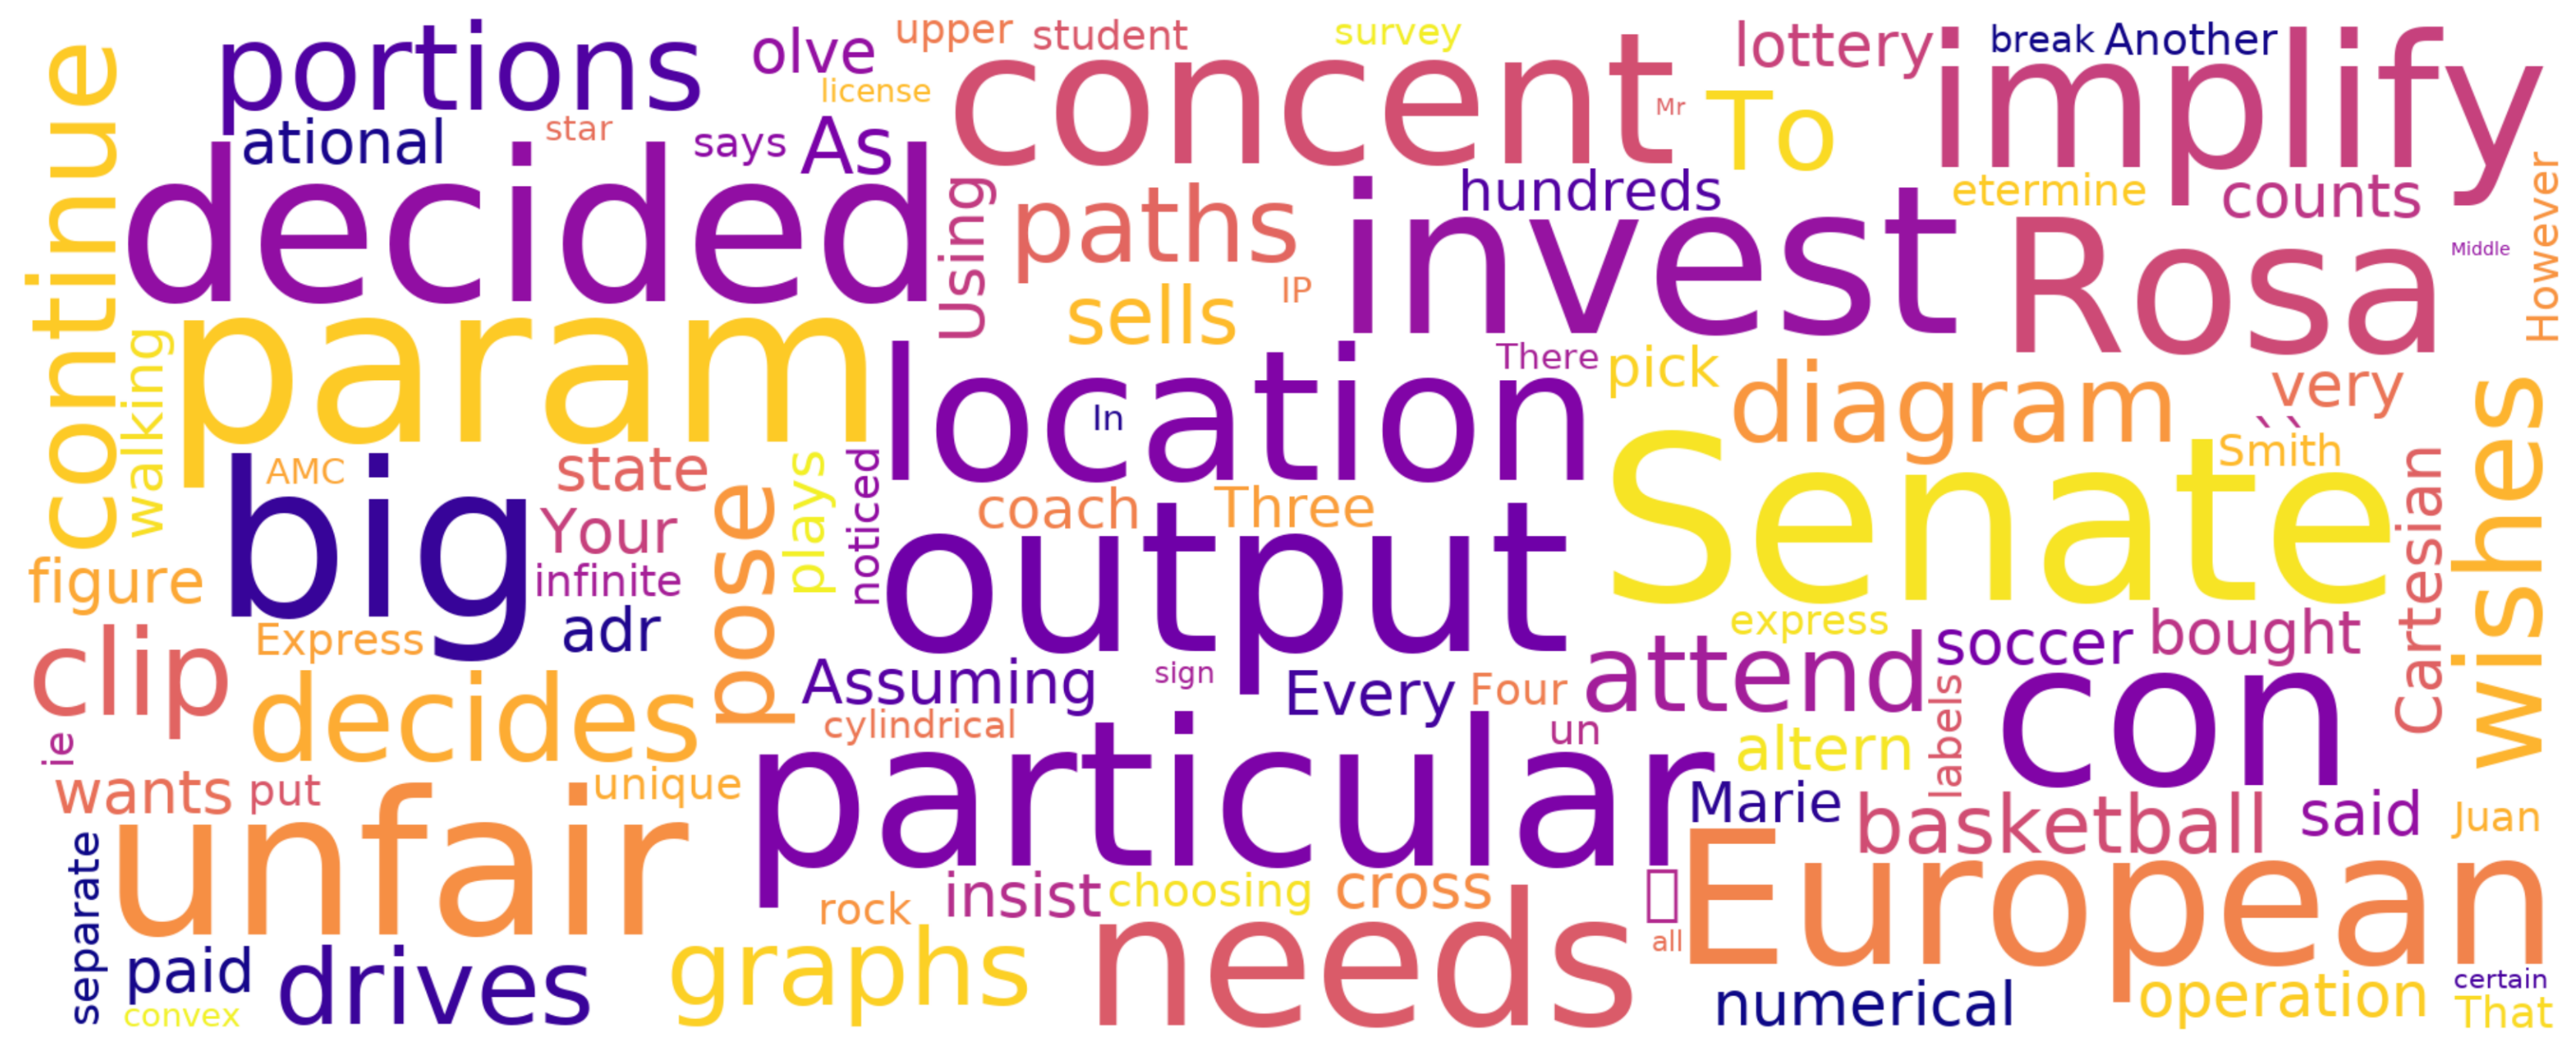

Supplement: supplementary_material [file token_W_wordcloud_low.pdf › Logic_Math/figs/token_W_wordcloud_low.pdf]
